# Supplementary material for: Strain of Synechocystis PCC 6803 with Aberrant Assembly of Photosystem II Contains Tandem Duplication of a Large Chromosomal Region
Source: PubMed Central journal article supplement (PMC4867675; doi:10.3389/fpls.2016.00648), 2016-05-12
Supplement: Image2.pdf [file Image2.pdf]

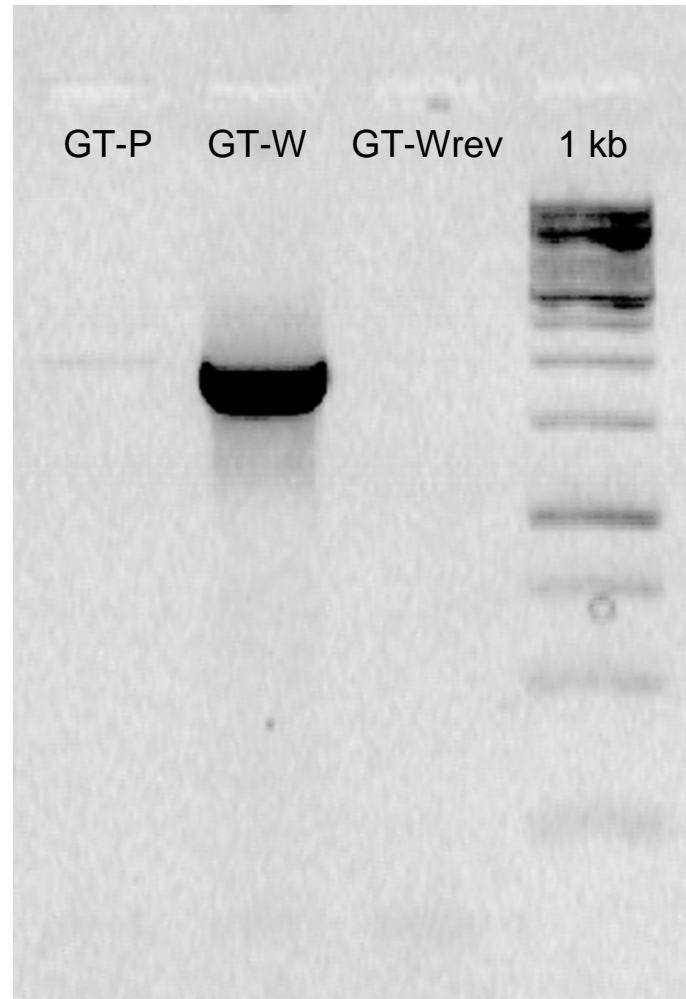

**Fig. S2. PCR detection of the 110 kbp duplication** using outbound primers from the beginning and from the end of duplication. The expected size of the PCR product is 1690 bp. The size of the closest bands on the 1 kb DNA ladder is 1.5 and 2 kbp.
